# Supplementary material for: Purine signaling pathway dysfunction in autism spectrum disorders: Evidence from multiple omics data
Source: Front Mol Neurosci. 2023 Feb 3;16:1089871. doi: 10.3389/fnmol.2023.1089871 (PMC9935591; doi:10.3389/fnmol.2023.1089871)
Supplement: Supplementary file 1 [file Table_1.xlsx]

## Sheet: Significant metabolite
Significant difference metabolite
Molecular name	Formula	Molecular Weight	RT [min]	ChemSpider_Results	mzCloud_Results	p.value	FDR	VIP	Fold Change	log2(FC)	Match	HMDB	PubChem	KEGG
5414	C22 H22 N6 O5 S2	514.107	15.018	Full match	No results	7.2261e-12	4.4152e-09	2.81307	4.47	2.1603	NA	NA	NA	NA
Sakuranin	C22 H24 O10	448.135	15.562	Full match	No results	9.1292e-10	2.789e-07	2.68211	4.4965	2.1688	NA	NA	NA	NA
Streptamine 4-phosphate	C6 H15 N2 O7 P	258.061	15.591	Full match	Invalid mass	2.2012e-09	4.4831e-07	2.67507	2.8187	1.495	NA	NA	NA	NA
Pibutidine	C19 H24 N4 O3	356.186	15.336	Full match	No results	1.1783e-07	1.7998e-05	2.55568	3.765	1.9126	NA	NA	NA	NA
Octylphosphonic acid	C8 H19 O3 P	194.107	12.02	No results	Full match	1.1115e-06	0.00013583	2.3774	1.591	0.66994	NA	NA	NA	NA
Methyl hydrogen phenylphosphonate	C7 H9 O3 P	172.029	13.588	Full match	No results	9.7064e-06	0.00081826	2.29029	1.5719	0.65251	Monomethyl phenylphosphonate	HMDB0031868	24913	NA
Linoleyl carnitine	C25 H45 N O4	423.335	13.097	Full match	No results	1.0026e-05	0.00081826	2.28843	0.45479	-1.1367	Linoleyl carnitine	HMDB0006469	6450015	NA
(4S)-4-{[(11Z)-3-Hydroxy-11-octadecenoyl]oxy}-4-(trimethylammonio)butanoate	C25 H47 N O5	441.345	13.096	Full match	No results	1.1009e-05	0.00081826	2.28295	0.45716	-1.1292	NA	NA	NA	NA
7-Isopropyl-4a-methyl-1-methylene-1,2,3,4,4a,9,10,10a-octahydrophenanthrene	C19 H26	254.203	15.049	Full match	No results	1.2053e-05	0.00081826	2.29619	0.43135	-1.2131	NA	NA	NA	NA
4-tert-octylphenol	C16 H26 O2	250.193	15.887	Full match	No results	3.5312e-05	0.0019271	2.28283	0.57684	-0.79376	NA	NA	NA	NA
Piceatannol	C14 H12 O4	244.071	11.534	No results	Invalid mass	3.5879e-05	0.0019271	2.16617	1.1564	0.20965	3,3',4'5-Tetrahydroxystilbene	HMDB0004215	667639	C05901
aminitrozole	C5 H5 N3 O3 S	187.005	5.718	Full match	No results	3.7849e-05	0.0019271	2.17929	0.14108	-2.8254	NA	NA	NA	NA
(1R,2R,6S,7S,8R,10S,11S,12R,16R,18R)-6,7-Dihydroxy-8-(hydroxymethyl)-16-isopropenyl-4,18-dimethyl-14-[(1E,3E)-1,3-tridecadien-1-yl]-9,13,15,19-tetraoxahexacyclo[12.4.1.0~1,11~.0~2,6~.0~8,10~.0~12,16~]nonadec-3-en-5-one	C34 H48 O8	584.336	14.871	Full match	No results	4.2127e-05	0.00198	2.2342	2.5542	1.3529	NA	NA	NA	NA
dihydroergocristine	C35 H41 N5 O5	611.309	15.179	Full match	No results	7.193e-05	0.0031392	2.21317	2.0934	1.0659	NA	NA	NA	NA
2,4-Diaminobutanoic acid	C4 H10 N2 O2	118.074	1.298	Full match	Invalid mass	0.00013056	0.0052914	2.03858	1.5214	0.60543	2,4-Diaminobutyric acid	HMDB0002362	470	NA
Decoside	C30 H42 O9	546.285	14.509	Full match	No results	0.00013856	0.0052914	2.10247	2.1695	1.1174	NA	NA	NA	NA
Porphine	C20 H14 N4	310.123	14.081	Full match	No results	0.00017099	0.0061457	2.09913	0.3204	-1.642	Pentaporphyrin I	HMDB0000839	NA	C09541
(15:0)-Anacardic acid	C22 H36 O3	348.266	14.423	Full match	Invalid mass	0.00018457	0.0062652	2.10586	0.54439	-0.87729	2-Hydroxy-6-pentadecylbenzoic acid	HMDB0029683	167551	C10759
5alpha-ergosta-7,22-diene-3beta,5-diol	C28 H46 O2	414.35	15.493	Full match	No results	0.00022135	0.007118	2.11538	0.55903	-0.839	5alpha-ergosta-7,22-diene-3beta,5-diol	NA	5280675	C04416
PD-0333941	C23 H22 N2 O4	390.157	13.025	No results	Full match	0.00025822	0.007174	1.98697	1.5967	0.67507	NA	NA	NA	NA
N6-METHYLLYSINE	C7 H16 N2 O2	160.121	1.001	Full match	Invalid mass	0.00026256	0.007174	2.09595	0.29935	-1.7401	NA	NA	NA	NA
3-dehydro-6-deoxoteasterone	C28 H48 O3	432.36	15.494	Full match	No results	0.00027024	0.007174	2.09406	0.54151	-0.88494	3-Dehydro-6-deoxoteasterone	METPA1210	NA	C15800
memantine	C12 H21 N	179.168	11.687	Full match	No results	0.00028004	0.007174	2.07752	0.84891	-0.23632	Memantine	HMDB0015177	4054	C13736
Diethyl phthalate	C12 H14 O4	222.089	11.535	Full match	Full match	0.00028179	0.007174	1.96157	1.1286	0.17453	NA	NA	NA	NA
Egualen	C15 H18 O3 S	278.097	14.085	Full match	No results	0.00037905	0.009264	2.0267	0.34609	-1.5308	NA	NA	NA	NA
Spectinomycin	C14 H24 N2 O7	332.16	12.231	Full match	Full match	0.00040856	0.0096012	1.89661	1.1368	0.18499	Spectinomycin	HMDB0015055	15541	C02078
patellamide D	C38 H48 N8 O6 S2	776.313	12.98	Full match	No results	0.00043479	0.0098392	1.95754	3.1464	1.6537	NA	NA	NA	NA
thr-asp	C8 H14 N2 O6	234.085	0.6	Full match	No results	0.00062978	0.013743	1.86311	2.2072	1.1422	Threoninyl-Aspartate	HMDB0029057	7016067	NA
Urdamycinone B	C25 H24 O8	452.148	15.143	Full match	No results	0.00078347	0.016507	1.86398	2.2561	1.1738	Urdamycinone B	NA	582794	C12404
4-tert-Octylphenol monoethoxylate	C16 H26 O2	250.193	15.887	Full match	No results	0.0010917	0.022233	1.98181	0.57684	-0.79376	NA	NA	NA	NA
16-feruloyloxypalmitic acid	C26 H40 O6	448.283	13.723	Full match	Invalid mass	0.0011691	0.022663	1.97552	0.57821	-0.79034	NA	NA	NA	NA
9-Decenoylcarnitine	C17 H31 N O4	313.225	10.713	Full match	No results	0.0011887	0.022663	1.91873	0.63014	-0.66626	9-Decenoylcarnitine	HMDB0013205	53481651	NA
Valylserine	C8 H16 N2 O4	204.111	1.093	Full match	Invalid mass	0.0012372	0.022663	1.87633	0.24056	-2.0555	Valyl-Serine	HMDB0029136	6992640	NA
(3beta,22R,25R)-26-(beta-D-Glucopyranosyloxy)-22-methoxyfurost-5-en-3-yl 6-deoxy-alpha-L-mannopyranosyl-(1->2)-[6-deoxy-alpha-L-mannopyranosyl-(1->4)]-beta-D-glucopyranoside	C52 H86 O22	1062.57	14.717	Full match	No results	0.0012611	0.022663	1.80255	0.47956	-1.0602	NA	NA	NA	NA
2-pyridone	C5 H5 N O	95.0372	1.159	Full match	No results	0.0013548	0.023651	1.81876	1.3029	0.38171	2-Hydroxypyridine	HMDB0013751	8871	C02502
DL-Lactic Acid	C3 H6 O3	90.0318	2.222	Full match	No results	0.0015821	0.025862	1.78584	1.7354	0.79524	NA	NA	NA	NA
Ethyl acetate	C4 H8 O2	88.0526	9.698	Full match	Invalid mass	0.0016082	0.025862	1.81966	1.246	0.31734	Ethyl acetate	HMDB0031217	8857	C00849
Androstanolone	C19 H30 O2	290.224	15.493	Full match	No results	0.0016084	0.025862	1.89735	0.59763	-0.74267	Dihydrotestosterone	HMDB0002961	10635	C03917
9,12-Hexadecadienoylcarnitine	C23 H41 N O4	395.303	12.6	Full match	No results	0.0016509	0.025865	1.87162	0.59467	-0.74983	9,12-Hexadecadienoylcarnitine	HMDB0013334	53481687	NA
nostopeptolide A2	C52 H78 N10 O14	1066.57	14.808	Full match	No results	0.0017693	0.027026	1.79078	0.71424	-0.48552	NA	NA	NA	NA
Diisodecyl phthalate	C28 H46 O4	446.339	15.43	Full match	No results	0.0018477	0.027536	1.85427	0.64367	-0.63561	NA	NA	NA	NA
Ethanal tetramer	C8 H16 O4	176.105	9.754	Full match	No results	0.0019509	0.028042	1.80227	1.2449	0.31598	NA	NA	NA	NA
N-(1-Benzothiophen-3-yl)-N'-(3-cyclopropyl-1-methyl-1H-pyrazol-5-yl)urea	C16 H16 N4 O S	334.088	14.207	No match	Invalid mass	0.0019735	0.028042	1.77081	1.205	0.26906	NA	NA	NA	NA
6-Ketoprostaglandin F1a	C20 H34 O6	352.222	12.752	No results	Invalid mass	0.0020651	0.028677	1.74794	0.70003	-0.5145	6-Keto-prostaglandin F1a	HMDB0002886	5280888	C05961
Olean-12-ene-3,16,21,22,23,28-hexol	C30 H50 O6	506.359	14.117	Full match	No results	0.0025951	0.035236	1.84811	0.70997	-0.49416	NA	NA	NA	NA
6alpha-hydroxy-6-deoxocastasterone	C28 H50 O5	466.366	14.649	Full match	No results	0.0026533	0.035243	1.76254	0.67606	-0.56478	NA	NA	NA	NA
Piracetam	C6 H10 N2 O2	142.074	0.602	Full match	No results	0.0028866	0.037526	1.64314	1.5396	0.62259	NA	NA	NA	NA
MDMA Methylene homolog	C12 H17 N O2	207.126	5.268	Partial match	Full match	0.0031329	0.039648	1.75707	0.22459	-2.1546	NA	NA	NA	NA
N-Stearoyl-L-tyrosine	C27 H45 N O4	447.335	13.098	Full match	No results	0.003244	0.039648	1.66579	0.41734	-1.2607	NA	NA	NA	NA
D-PANTOTHENIC ACID	C9 H17 N O5	219.111	5.606	Full match	Invalid mass	0.0032445	0.039648	1.75742	1.6956	0.76182	Pantothenic acid	HMDB0000210	6613	C00864
Allantoic acid	C4 H8 N4 O4	176.054	0.953	Full match	Invalid mass	0.0033143	0.039707	1.71224	0.70737	-0.49947	Allantoic acid	HMDB0001209	203	C00499
gamma-Glutamylleucine	C11 H20 N2 O5	260.137	6.829	Full match	Invalid mass	0.0034656	0.040721	1.68707	0.75613	-0.40329	gamma-Glutamylleucine	HMDB0011171	4524287	NA
2-methylbutyrylcarnitine	C12 H23 N O4	245.163	6.504	Full match	No results	0.0036378	0.041938	1.71263	0.64561	-0.63126	NA	NA	NA	NA
1-[(9Z)-hexadecenoyl]-sn-glycero-3-phosphocholine	C24 H48 N O7 P	493.317	14.271	Full match	Invalid mass	0.0040359	0.045546	1.69959	0.72646	-0.46105	NA	NA	NA	NA
3a,7a-Dihydroxycholanoic acid	C24 H40 O4	392.292	14.855	Full match	No results	0.0041951	0.045546	1.68808	0.73137	-0.45133	3a,7a-Dihydroxycholanoic acid	HMDB0000384	21252245	NA
19,23-Dihydroxy-3-{[(2E)-3-(4-hydroxyphenyl)-2-propenoyl]oxy}urs-12-en-28-oic acid	C39 H54 O7	634.385	15.225	Full match	No results	0.0043575	0.045546	1.6824	0.42199	-1.2447	NA	NA	NA	NA
bilirubin	C33 H36 N4 O6	584.264	13.55	Full match	No results	0.0043618	0.045546	1.77186	0.47872	-1.0627	Bilirubin	HMDB0000054	21252250	C00486
cis-trihomoaconitic acid	C9 H12 O6	216.063	7.597	Full match	No results	0.0043708	0.045546	1.73294	0.14347	-2.8012	NA	NA	NA	NA
Guvacine	C6 H9 N O2	127.063	1.153	Full match	Invalid mass	0.004398	0.045546	1.64567	1.6081	0.68533	NA	NA	NA	NA
Hydrocortisone butyrate (JP15/USP)	C25 H36 O6	432.249	13.468	Full match	No results	0.0046031	0.046875	1.68859	1.2926	0.37025	NA	NA	NA	NA
1-[5-(4-Hydroxy-2-butanyl)-2-methyltetrahydro-2-furanyl]-4-methyl-2-pentanone	C15 H28 O3	256.205	15.446	Full match	No results	0.0046973	0.04705	1.76904	0.68431	-0.54727	NA	NA	NA	NA
2,6-Di-iso-propylnaphthalene	C16 H20	212.157	15.047	Full match	No results	0.0048982	0.048271	1.7103	0.76427	-0.38784	NA	NA	NA	NA
Uric acid	C5 H4 N4 O3	168.027	1.234	No results	Invalid mass	6.0228e-06	0.0010239	2.42148	0.48162	-1.054	Uric acid	HMDB0000289	1175	C00366
(2S)-1-Hydroxy-3-[(5Z,8Z,11Z,14Z)-5,8,11,14-icosatetraenoyloxy]-2-propanyl docosanoate	C45 H80 O5	700.6	15.751	Full match	No results	0.00010876	0.0092444	2.46028	2.0562	1.0399	NA	NA	NA	NA
Etodolac	C17 H21 N O3	287.15	12.739	No results	Invalid mass	0.00052995	0.026495	2.14042	2.4271	1.2792	Etodolac	HMDB0014887	3308	C06991
(2E,7Z)-1-(4-Hydroxy-3-methoxyphenyl)-9-(4-hydroxyphenyl)-2,7-nonadiene-4,6-dione	C22 H22 O5	366.147	10.708	Full match	No results	0.00062341	0.026495	1.90105	0.49786	-1.0062	NA	NA	NA	NA
Full match: the full match means that both the parent ion (metabolite) and the daughter ion (produced by metabolite fragmentation) are matched exactly with the database;
Invalid mass: the invalid mass means that the parent ion is outside the mass tolerance range and the daughter ion is matched exactly.

## Sheet: Uric acid
ID	Name	Formula	Molecular Weight	RT [min]	ChemSpider_Results	mzCloud_Results
Com_76_neg	Uric acid	C5 H4 N4 O3	168.027	1.234	No results	Invalid mass
Com_59_pos	Uric acid	C5 H4 N4 O3	168.029	1.287	Full match	Full match
